# Supplementary material for: Genetic variation in the immunosuppression pathway genes and breast cancer susceptibility: a pooled analysis of 42,510 cases and 40,577 controls from the Breast Cancer Association Consortium
Source: Springer Nature journal article supplement (doi:10.1007/s00439-015-1616-8), 2015-11-30
Supplement: MOESM1 [file 439_2015_1616_MOESM1_ESM.pdf]

**Table S1** Description of 37 Breast Cancer Association Consortium studies included in this analysis.

| Study Acronym | Study Name                                                | Country     | Study Design                                                                                       | N Cases | Age (mean, years) | N Controls | Age (mean, years) |
|---------------|-----------------------------------------------------------|-------------|----------------------------------------------------------------------------------------------------|---------|-------------------|------------|-------------------|
| ABCFS         | Australian Breast Cancer Family Study                     | Australia   | Population-based case-control study                                                                | 790     | 39.5              | 551        | 41.9              |
| ABCS          | Amsterdam Breast Cancer Study                             | Netherlands | Hospital-based consecutive cases; population-based controls                                        | 1,941   | 42.8              | 1,557      | 47.3              |
| BBC           | Bavarian Breast Cancer Cases and Controls                 | Germany     | Hospital based cases; population based controls                                                    | 554     | 60.7              | 458        | 57.1              |
| BBCS          | British Breast Cancer Study                               | UK          | Cancer registry and National Cancer Research network (NCRN) based cases; population based controls | 1,445   | 52.7              | 1,329      | 45.1              |
| BIGGS         | Breast Cancer in Galway Genetic Study                     | Ireland     | Hospital based cases; population based controls                                                    | 779     | 53.3              | 49         | 65.6              |
| BSUCH         | Breast Cancer Study of the University of Heidelberg       | Germany     | Hospital based cases; healthy blood donator controls                                               | 814     | 55.3              | 954        | 57.3              |
| CECILE        | CECILE Breast Cancer Study                                | France      | Population-based case-control study                                                                | 900     | 54.4              | 999        | 54.7              |
| CGPS          | Copenhagen General Population Study                       | Denmark     | Population-based case-control study                                                                | 2,811   | 61.8              | 4,534      | 58.2              |
| CNIO-BCS      | Spanish National Cancer Centre Breast Cancer Study        | Spain       | Case-control study                                                                                 | 704     | 54.2              | 834        | 50.0              |
| CTS           | California Teachers Study                                 | USA         | Prospective cohort study; nested case-control                                                      | 51      | 62.9              | 44         | 55.6              |
| ESTHER        | ESTHER Breast Cancer Study                                | Germany     | Population-based case-control study                                                                | 471     | 60.6              | 502        | 62.3              |
| GC-HBOC       | German Consortium for Hereditary Breast & Ovarian Cancer  | Germany     | Population-based familial case-control study                                                       | 0       | 0.0               | 139        | 57.7              |
| GENICA        | Gene Environment Interaction and Breast Cancer in Germany | Germany     | Population-based case-control study                                                                | 465     | 57.0              | 427        | 57.3              |
| HEBCS         | Helsinki Breast Cancer Study                              | Finland     | Hospital-based case-control study + additional familial cases                                      | 1,517   | 56.8              | 1,234      | 41.0              |
| HMBCS         | Hannover-Minsk Breast Cancer Study                        | Belarus     | Hospital based cases; population based controls                                                    | 688     | 49.0              | 130        | 41.9              |
| KBCP          | Kuopio Breast Cancer Project                              | Finland     | Population-based prospective clinical cohort                                                       | 411     | 58.9              | 251        | 52.9              |
| LMBC          | Leuven Multidisciplinary Breast Centre                    | Belgium     | Hospital-based case-control study                                                                  | 2,522   | 56.6              | 1,386      | 44.0              |
| MARIE         | Mammary Carcinoma Risk Factor Investigation               | Germany     | Population-based case-control study                                                                | 1,656   | 62.3              | 1,778      | 61.8              |

| Study Acronym | Study Name                                                                                                        | Country                   | Study Design                                                                                                                               | N Cases | Age (mean, years) | N Controls | Age (mean, years) |
|---------------|-------------------------------------------------------------------------------------------------------------------|---------------------------|--------------------------------------------------------------------------------------------------------------------------------------------|---------|-------------------|------------|-------------------|
| MBCSG         | Milan Breast Cancer Study Group                                                                                   | Italy                     | Clinic-based recruitment of familial/early onset breast cancer patients (cases); population-based controls                                 | 189     | 42.0              | 400        | 42.3              |
| MCBCS         | Mayo Clinic Breast Cancer Study                                                                                   | USA                       | Hospital-based case-control study                                                                                                          | 1,546   | 57.0              | 1,931      | 56.6              |
| MCCS          | Melbourne Collaborative Cohort Study                                                                              | Australia                 | Population-based prospective cohort study                                                                                                  | 614     | 60.8              | 511        | 56.3              |
| MEC           | Multi-ethnic Cohort                                                                                               | USA                       | Prospective cohort study; nested case-control study                                                                                        | 703     | 66.4              | 741        | 59.8              |
| MTLGEBCS      | Montreal Gene-Environment Breast Cancer Study                                                                     | Canada                    | Population-based case-control study                                                                                                        | 489     | 61.8              | 436        | 61.6              |
| NBCS          | Norwegian Breast Cancer Study                                                                                     | Norway                    | Hospital-based case-control study                                                                                                          | 828     | 60.1              | 214        | 51.0              |
| NBHS          | Nashville Breast Health Study                                                                                     | USA                       | Population-based case-control study                                                                                                        | 125     | 52.6              | 118        | 52.6              |
| OBCS          | Oulu Breast Cancer Study                                                                                          | Finland                   | Hospital-based case-control study                                                                                                          | 500     | 57.5              | 414        | 42.4              |
| OFBCR         | Ontario Familial Breast Cancer Registry                                                                           | Canada                    | Population-based familial case-control study                                                                                               | 1,157   | 53.0              | 511        | 51.9              |
| PBCS          | NCI Polish Breast Cancer Study                                                                                    | Poland                    | Population-based case-control study                                                                                                        | 519     | 56.3              | 424        | 56.3              |
| SASBAC        | Singapore and Sweden Breast Cancer Study                                                                          | Sweden                    | Population-based case-control study                                                                                                        | 1,163   | 63.0              | 1,378      | 63.3              |
| SBCS          | Sheffield Breast Cancer Study                                                                                     | UK                        | Hospital-based case-control study                                                                                                          | 751     | 59.5              | 848        | 57.5              |
| SEARCH        | Study of Epidemiology and Risk factors in Cancer Heredity                                                         | UK                        | Population-based case-control study                                                                                                        | 9,095   | 54.4              | 8,064      | 57.8              |
| SKKDKFZS      | Städtisches Klinikum Karlsruhe Deutsches Krebsforschungszentrum Study                                             | Germany                   | Hospital-based breast cancer cohort                                                                                                        | 134     | 58.9              | 29         | 60.7              |
| SZBCS         | IHCC-Szczecin Breast Cancer Study                                                                                 | Poland                    | Hospital based case-control study                                                                                                          | 303     | 55.7              | 315        | 57.4              |
| TNBCC         | Triple Negative Breast Cancer Study                                                                               | USA and Greece            | Hospital-based case-control study                                                                                                          | 499     | 52.9              | 152        | 55.4              |
| UKBGS         | UK Breakthrough Generations Study                                                                                 | UK                        | Prospective cohort study; nested case-control study of women who had had breast cancer prior to entry into the cohort                      | 413     | 56.3              | 470        | 54.2              |
| kConFab/AOCS  | Kathleen Cuningham Foundation Consortium for research into Familial Breast Cancer/Australian Ovarian Cancer Study | Australia and New Zealand | Clinic-based recruitment of familial breast cancer patients (cases); population-based case-control study of ovarian cancer (controls only) | 410     | 45.7              | 897        | 57.8              |
| pKARMA        | Karolinska Mammography Project for Risk Prediction of Breast Cancer - prevalent cases                             | Sweden                    | Case-control study                                                                                                                         | 4,553   | 58.1              | 5,568      | 53.4              |
